# Supplementary material for: Investigating Fundamental Interactions between Pectin and Cellulose Nanocrystals: A Molecular Dynamics Simulation
Source: Research Square preprint supplement (doi:10.21203/rs.3.rs-5079737/v1), 2024-12-18
Supplement: Supplementary file 1 [file f0a815f463e1e6b20557945e.pdf]

Noname manuscript No.  
(will be inserted by the editor)

---

# Investigating Fundamental Interactions between Pectin and Cellulose Nanocrystals: A Molecular Dynamics Simulation

Xiawa Wu\* · Anamika Prasad

Received: date / Accepted: date

---

\*X. Wu (E-mail: xxw5228@psu.edu)  
Department of Mechanical Engineering,  
Pennsylvania State University Erie, The Behrend College, Erie, PA, USA

A. Prasad (E-mail: anprasad@fiu.edu)  
Department of Biomedical Engineering,  
Department of Mechanical Engineering,  
Florida International University, Miami, FL, USA

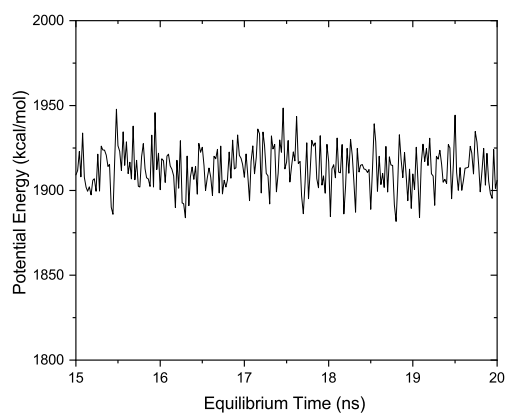

(a)

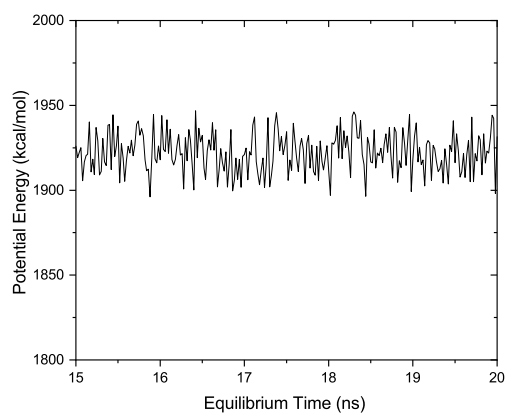

(b)

**Fig. S1** The potential energies of (a) an HG-50 and (b) an HG-0 molecule during the last 5 ns of equilibrium.

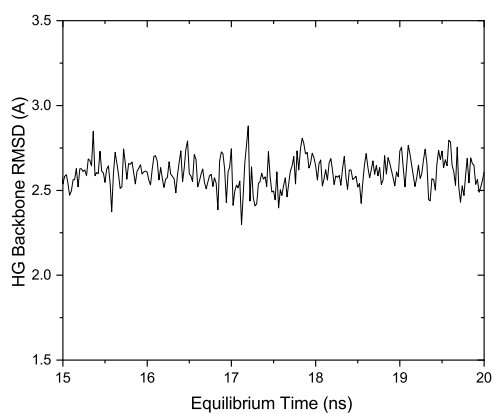

(a)

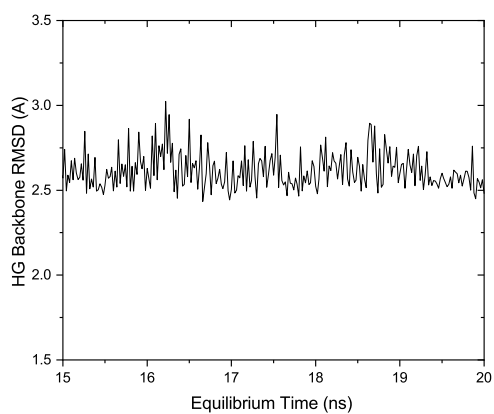

(b)

**Fig. S2** The RMSD of backbone atoms of (a) an HG-50 and (b) an HG-0 molecule during the last 5 ns equilibrium.

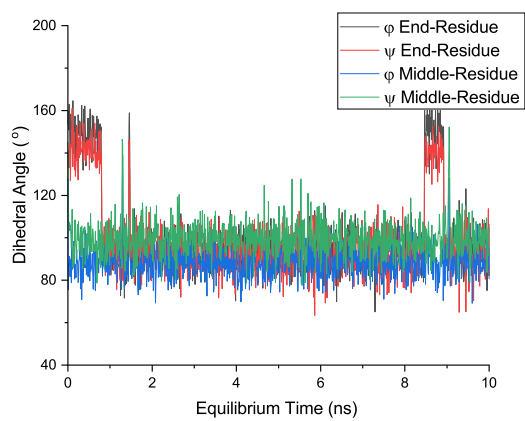

(a)

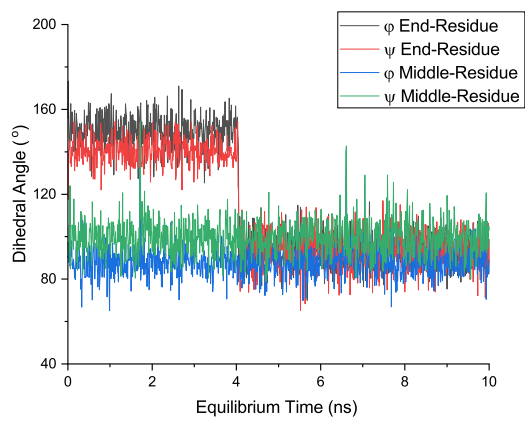

(b)

**Fig. S3** The dihedral angles of (a) an HG-50 and (b) an HG-0 molecule during a 10 ns equilibrium.

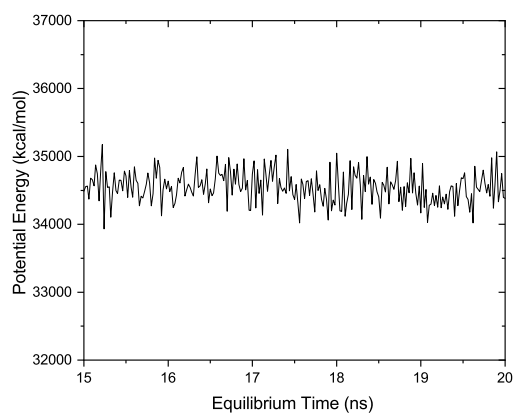

(a)

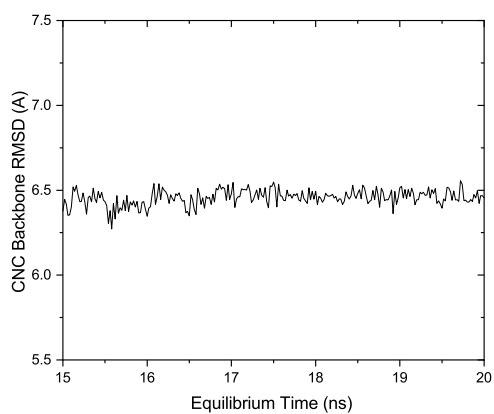

(b)

**Fig. S4** The last 5 ns equilibrium of a CNC particle at 300K and (a) the potential energy and (b) the RMSD of backbone atoms are shown for equilibrium state.

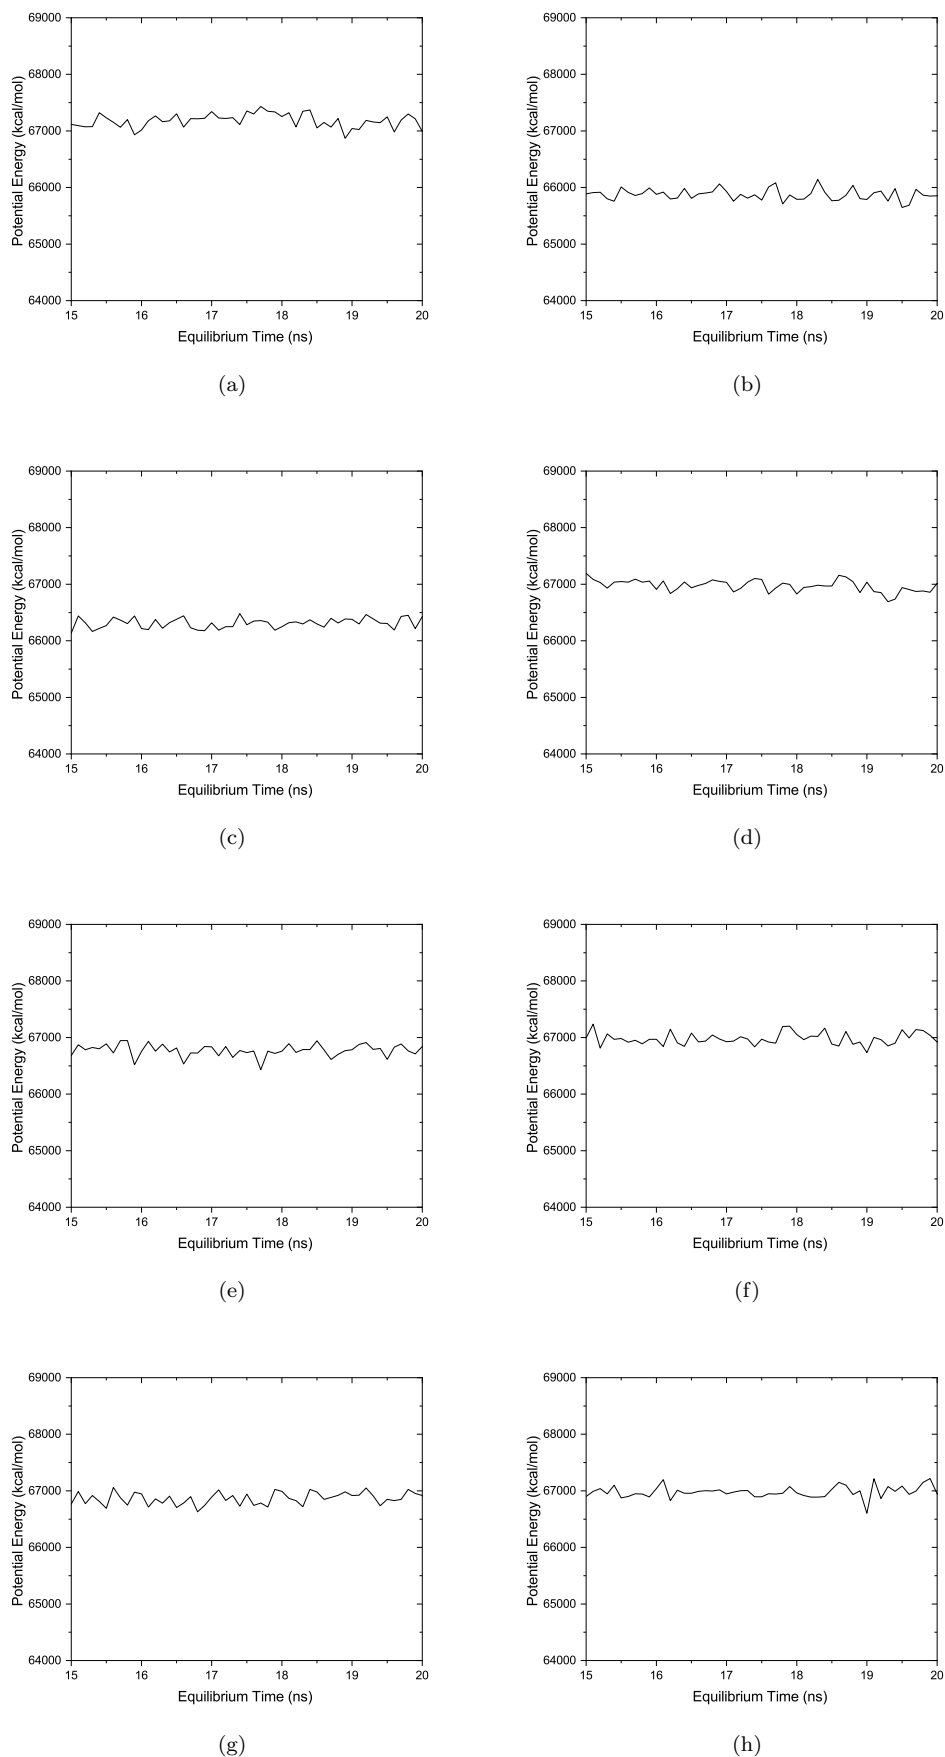

**Fig. S5** The last 5 ns of potential energies in the equilibrium simulation of the baseline models (a) (200)/(200), (b) (110)/(110) and the interphase models with (c,d) HG-100, (e,f) HG-50 and (g,h) HG-0 molecules between the CNC (200) and (110) surfaces, in the left and right columns, respectively.

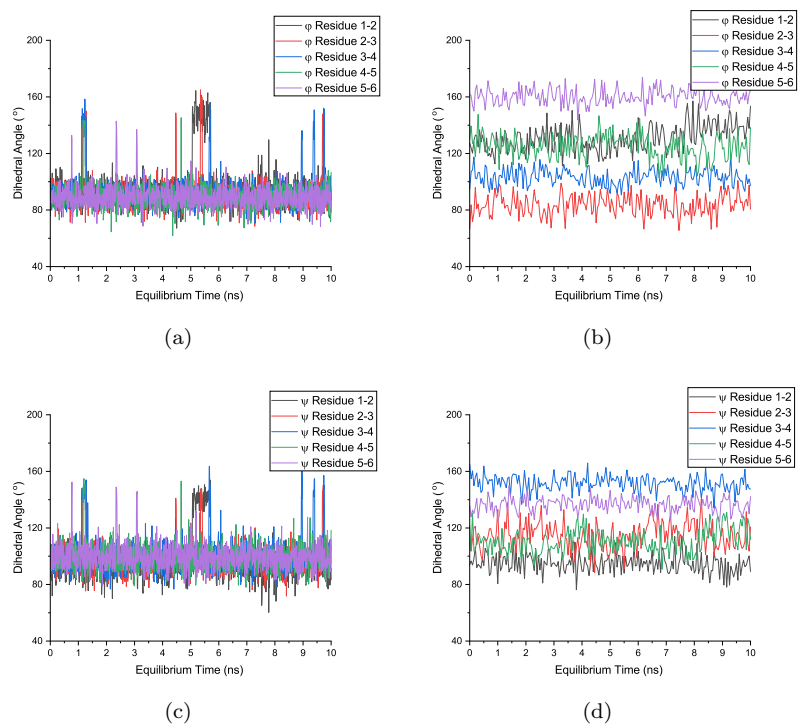

**Fig. S6** (a,c) The dihedral angles in a HG-100 molecule equilibrium in a vacuum. The angles are constant inside a molecule. (b,d) After being physically absorbed between CNC (200) surfaces, the dihedral angles vary through a pectin molecule, reflecting local HG/CNC interaction.
